# Supplementary material for: The SHAPE Project: An Innovative Approach to Understanding Seasonal and Diel Dissolved Oxygen Dynamics in the Marano and Grado Lagoon (Adriatic Sea) under the WFD/2000/60/CE
Source: MDPI journal article supplement (doi:10.3390/jmse10020208), 2022-02-04
Supplement: s1 [file s1]

Archive with 8 entries (8 files):
- File_1SM.pdf
- File_2SM.pdf
- Table_S1.xlsx
- Table_S2.xlsx
- Table_S3.xlsx
- Table_S4.xlsx
- Table_S5.xlsx
- Table_S6.xlsx
