# Supplementary material for: The SHAPE Project: An Innovative Approach to Understanding Seasonal and Diel Dissolved Oxygen Dynamics in the Marano and Grado Lagoon (Adriatic Sea) under the WFD/2000/60/CE
Source: MDPI journal article supplement (doi:10.3390/jmse10020208), 2022-02-04
Supplement: s1 [file s1 › Table_S1.xlsx]

## Sheet: Table_1SM
	Parameter			Range	Accuracy	Resolution
	Depth (m)			0-20	<0.06	0.006
	Temperature (°C)			-5 to +35 °C	<50 m°C in the range 0-20 °C	1 m°C at 10 °C
	Conductivity (mS/cm)			0 to 70 mS/cm	<0.05 mS/cm in the range 0 to 60 mS/cm	0.0012 mS/cm
				0 to 2000 μS/cm	5 μS/cm	0.04 μS/cm
	pH			0 to 14		0.0003
	Dissolved oxygen (%)			0 to 150%	<5%	0.01%
	Table S1. Characteristics of the multiprobes sensors as reported by the parent company (NKE Instrumentation).
