# Supplementary material for: The SHAPE Project: An Innovative Approach to Understanding Seasonal and Diel Dissolved Oxygen Dynamics in the Marano and Grado Lagoon (Adriatic Sea) under the WFD/2000/60/CE
Source: MDPI journal article supplement (doi:10.3390/jmse10020208), 2022-02-04
Supplement: s1 [file s1 › Table_S2.xlsx]

## Sheet: Table_S2
PROBE ID	LAT	LON	YEAR	DEPLOYMENT (PERIOD)	SITE NAME	WATER BODY	AVERAGE DEPTH (m)	DISTANCE FROM MAIN CHANNEL (m)
20137	45.6994	13.0892	2013	June-December	M1	TPO5	0.7	50
20138	45.7705	13.2187	2013	June-December	M11	TME1	0.5	2600
20139	45.7559	13.1274	2013	June-December	M7	TME2	0.5	3300
20140	45.7281	13.1092	2013	June-December	M3	TPO4	0.8	450
20141	45.7374	13.1717	2013	June-December	M8	TPO3	0.9	1000
20137	45.6994	13.0892	2014	July-October	M1	TPO5	0.7	50
20138	45.7705	13.2187	2014	July-October	M11	TME1	0.5	2600
20139	45.7559	13.1274	2014	July-October	M7	TME2	0.5	3300
20140	45.7281	13.1092	2014	July-October	M3	TPO4	0.8	450
20141	45.7104	13.3069	2014	September-November (Val Noghera)	G2	FM4	n.a.	n.a.
20137	45.7087	13.3364	2015	June-October	G3	TEU2	0.8	600
20138	45.7451	13.2757	2015	August-November	G1	TPO2	1.2	1300
20139	45.7501	13.126	2015	July-October	M6	TME3	0.8	2700
20140	45.6963	13.387	2015	July-October	G6	FM3	1.2	0
20141	45.7324	13.3483	2015	July-October	G5	TPO1	0.8	400
20137	45.7087	13.3364	2016	May-October	G3	TEU2	0.8	600
20138	45.7451	13.2757	2016	August-November	G1	TPO2	1.2	1300
20139	45.7501	13.126	2016	June-November	M6	TME3	0.8	2700
20140	45.6963	13.387	2016	May-November	G6	FM3	1.2	0
20141	45.7324	13.3483	2016	May-November	G5	TPO1	0.8	400
20137	45.7111	13.1265	2017	July-October	M2	TPO5	1.2	250
20138	45.739	13.2189	2017	July-October	M10	TPO3	1.3	1800
20139	45.7358	13.1361	2017	July-August	M4	TPO4	1.2	1000
20140	45.7067	13.4172	2017	July-October	G7	FM3	1.6	5
20141	45.7304	13.3298	2017	July-August	G4	TPO2	0.8	900
20137	45.7111	13.1265	2018	July-November	M2	TPO5	1.2	250
20138	45.739	13.2189	2018	July-November	M10	TPO3	1.3	1800
20139	45.7358	13.1361	2018	August-November	M4	TPO4	1.2	1000
20140	45.7067	13.4172	2018	July-November	G7	FM3	1.6	5
20141	45.7304	13.3298	2018	July-October	G4	TPO2	0.8	900
20137	45.7326	13.2142	2019	May-November	M9	TEU4	1.2	130
20139	45.7422	13.1296	2019	July-October	M5	TME3	1.2	1800
20140	45.7067	13.4172	2019	June-November	G7	FM3	1.6	5
20138	45.7326	13.2142	2020	June-October	M9	TEU4	1.2	130
20141	45.7422	13.1296	2020	July-October	M5	TME3	1.2	1800
Table 2S. Identification and deployment of the 5 multiprobes (see Probe ID) from 2013 to 2020 in the Marano and Grado Lagoon. The correspondent water body (sensu WFD) is also reported..
