# Supplementary material for: The SHAPE Project: An Innovative Approach to Understanding Seasonal and Diel Dissolved Oxygen Dynamics in the Marano and Grado Lagoon (Adriatic Sea) under the WFD/2000/60/CE
Source: MDPI journal article supplement (doi:10.3390/jmse10020208), 2022-02-04
Supplement: s1 [file s1 › Table_S3.xlsx]

## Sheet: Table_S3
					Temperature	M1	M2	M3	M4	M5	M6	M7	M8	M9	M10	M11	G1	G2	G3	G4	G5	G6	G7
					N	16195	9919	14305	6450	1700	14863	12766	9254	8344	11864	15426	13059	4697	14638	3809	15082	14291	18871
					Shapiro-Wilk W	0.9751	0.9669	0.9844	0.9675	0.9962	0.949	0.9807	0.9274	0.9542	0.9541	0.9762	0.9615	0.9193	0.9698	0.9472	0.9694	0.9561	0.9659
					p(normal)	6.666e-46	1.144e-42	1.345e-36	7.891e-36	0.0002917	3.908e-57	3.789e-38	7.317e-55	4.187e-45	3.547e-51	2.286e-44	9.626e-50	1.292e-44	1.741e-47	5.902e-35	3.135e-48	1.147e-53	5.537e-54
					pH	M1	M2	M3	M4	M5	M6	M7	M8	M9	M10	M11	G1	G2	G3	G4	G5	G6	G7
					N	16193	9918	14305	6449	1700	14862	12766	9204	8344	11760	14914	13044	4307	14638	3711	14311	14286	18871
					Shapiro-Wilk W	0.9917	0.9783	0.9555	0.9549	0.9328	0.9937	0.9816	0.9325	0.9337	0.9493	0.9908	0.99	0.9745	0.905	0.8429	0.9963	0.9917	0.9971
					p(normal)	1.998e-29	3.176e-36	6.1e-54	1.093e-40	5.357e-27	7.269e-25	1.802e-37	1.907e-53	2.288e-51	9.178e-53	1.13e-29	3.255e-29	4.479e-27	4.271e-69	2.03e-51	1.821e-18	7.007e-28	1.606e-18
					Salinity	M1	M2	M3	M4	M5	M6	M7	M8	M9	M10	M11	G1	G2	G3	G4	G5	G6	G7
					N	16195	9919	14305	6450	1700	14863	12766	9254	8344	11864	15426	13059	4697	14638	3809	15082	14291	18871
					Shapiro-Wilk W	0.9511	0.9821	0.9313	0.9817	0.981	0.9757	0.9397	0.9475	0.9408	0.9458	0.9943	0.9263	0.9514	0.917	0.9806	0.933	0.9057	0.8667
					p(normal)	5.842e-58	1.861e-33	4.017e-62	4.666e-28	3.134e-14	4.056e-44	1.905e-57	3.649e-49	2.094e-49	3.813e-54	3.644e-24	1.041e-61	6.625e-37	2.479e-66	2.002e-22	1.154e-62	1.852e-68	0
					DO (mg l-1)	M1	M2	M3	M4	M5	M6	M7	M8	M9	M10	M11	G1	G2	G3	G4	G5	G6	G7
					N	15730	9822	14125	6428	1633	14454	12207	8734	7743	11440	15053	13024	4551	13450	3591	15047	13838	18569
					Shapiro-Wilk W	0.9833	0.9351	0.9847	0.9944	0.9922	0.9809	0.9901	0.9858	0.9932	0.9736	0.9862	0.9949	0.9354	0.9977	0.9977	0.9729	0.9889	0.9876
					p(normal)	4.437e-39	6.036e-54	3.453e-36	4.085e-15	1.34e-07	7.291e-40	3.85e-28	1.182e-28	1.031e-18	2.372e-41	1.465e-35	5.474e-21	1.29e-40	2.577e-13	3.384e-05	3.871e-46	2.705e-31	7.208e-37
					DO (%)	M1	M2	M3	M4	M5	M6	M7	M8	M9	M10	M11	G1	G2	G3	G4	G5	G6	G7
					N	15730	9822	14125	6428	1633	14454	12207	8734	7743	11440	15053	13024	4551	13450	3591	15047	13838	18569
					Shapiro-Wilk W	0.9799	0.9412	0.9533	0.9869	0.9899	0.9657	0.9791	0.9316	0.9708	0.9683	0.9684	0.9881	0.9281	0.9829	0.9946	0.9494	0.9521	0.9913
					p(normal)	5.592e-42	3.501e-52	1.325e-54	5.523e-24	3.167e-09	1.787e-49	1.085e-38	9.777e-53	6.133e-37	2.65e-44	9.036e-49	1.687e-31	2.907e-42	4.121e-37	2.993e-10	3.021e-57	1.157e-54	7.656e-32
					Table 3S. Application of the test for normality Shapiro-Wilk.
