# Supplementary material for: The SHAPE Project: An Innovative Approach to Understanding Seasonal and Diel Dissolved Oxygen Dynamics in the Marano and Grado Lagoon (Adriatic Sea) under the WFD/2000/60/CE
Source: MDPI journal article supplement (doi:10.3390/jmse10020208), 2022-02-04
Supplement: s1 [file s1 › Table_S4.xlsx]

## Sheet: Table_S4
						Site	Time interval
						M5	12/06/2019 - 17/07/2019
						M9	20/05/2019 - 14/11/2019
						G7	11/06/2019 - 13/11/2019
						M5	22/07/2020 - 03/11/2020
						M9	16/06/2020 - 02/11/2020
