# Supplementary material for: The SHAPE Project: An Innovative Approach to Understanding Seasonal and Diel Dissolved Oxygen Dynamics in the Marano and Grado Lagoon (Adriatic Sea) under the WFD/2000/60/CE
Source: MDPI journal article supplement (doi:10.3390/jmse10020208), 2022-02-04
Supplement: s1 [file s1 › Table_S5.xlsx]

## Sheet: Foglio1
M5_2019	Ordinary Least Squares Regression: Solar radiation-DO						M5_2020	Ordinary Least Squares Regression: Solar radiation-DO
	Slope a:	0.00055297	Std. error a:	5.9458e-05				Slope a:	1.9733e-05	Std. error a:	4.3849e-05
		t:	9.3002	p (slope):	1.2152e-19				t:	0.45003	p (slope):	0.65273
	Intercept b:	6.5275	Std. error b:	0.098123				Intercept b:	7.607	Std. error b:	0.049934
	Correlation:							Correlation:
	r:	0.30737						r:	0.0091573
	r2:	0.094478						r2:	8.3856e-05
	t:	9.3002						t:	0.45003
	p (uncorr.):	1.2152e-19						p (uncorr.):	0.65273
	Permutation p:	0.0001						Permutation p:	0.6581
M9_2019	Ordinary Least Squares Regression: Solar_radiation-DO						M9_2020	Ordinary Least Squares Regression: solar radiation-DO
	Slope a:	0.00044202	Std. error a:	2.4401e-05				Slope a:	0.00021393	Std. error a:	3.0205e-05
		t:	18.115	p (slope):	1.6786e-70				t:	7.0824	p (slope):	1.811e-12
	Intercept b:	7.2913	Std. error b:	0.031235				Intercept b:	8.4458	Std. error b:	0.036201
	Correlation:							Correlation:
	r:	0.27784						r:	0.13675
	r2:	0.077193						r2:	0.018701
	t:	18.115						t:	7.0824
	p (uncorr.):	1.6786e-70						p (uncorr.):	1.811e-12
	Permutation p:	0.0001						Permutation p:	0.0001
G7_2019	Ordinary Least Squares Regression: Solar_radiation-DO
	Slope a:	0.00029768	Std. error a:	4.3862e-05
		t:	6.7868	p (slope):	1.3311e-11
	Intercept b:	4.6051	Std. error b:	0.054892
	Correlation:
	r:	0.1113
	r2:	0.012388
	t:	6.7868
	p (uncorr.):	1.3311e-11
	Permutation p:	0.0001
Table 5SM. Relationships between DO and solar radiation intensity.
