# Supplementary material for: The SHAPE Project: An Innovative Approach to Understanding Seasonal and Diel Dissolved Oxygen Dynamics in the Marano and Grado Lagoon (Adriatic Sea) under the WFD/2000/60/CE
Source: MDPI journal article supplement (doi:10.3390/jmse10020208), 2022-02-04
Supplement: s1 [file s1 › Table_S6.xlsx]

## Sheet: Foglio1
M5_2019	Ordinary Least Squares Regression: Tide-DO						G7_2019	Ordinary Least Squares Regression: Tide-DO						M5_2020	Ordinary Least Squares Regression: Tide-DO
	Slope a:	0.036113	Std. error a:	0.0023271				Slope a:	-0.0021398	Std. error a:	0.0014794				Slope a:	0.0089403	Std. error a:	0.0013605
		t:	15.518	p (slope):	6.7811e-48				t:	1.4465	p (slope):	0.14813				t:	6.5715	p (slope):	6.08e-11
	Intercept b:	1.0594	Std. error b:	0.39814				Intercept b:	5.2023	Std. error b:	0.25778				Intercept b:	6.0739	Std. error b:	0.23869
	95% bootstrapped confidence intervals (N=1999):							95% bootstrapped confidence intervals (N=1999):							95% bootstrapped confidence intervals (N=1999):
	Slope a:	(0,032266, 0,040317)						Slope a:	(-0,0047514, 0,00055247)						Slope a:	(0,0064382, 0,011524)
	Intercept b:	(0,32438, 1,7307)						Intercept b:	(4,7436, 5,6642)						Intercept b:	(5,5974, 6,5133)
	Correlation:							Correlation:							Correlation:
	r:	0.47356						r:	-0.023821						r:	0.13254
	r2:	0.22426						r2:	0.00056746						r2:	0.017568
	t:	15.518						t:	-1.4465						t:	6.5715
	p (uncorr.):	6.7811e-48						p (uncorr.):	0.14813						p (uncorr.):	6.08e-11
	Permutation p:	0.0001						Permutation p:	0.1483						Permutation p:	0.0001
M9_2019	Ordinary Least Squares Regression: Tide-DO													M9_2020	Ordinary Least Squares Regression: A-B
	Slope a:	0.0033023	Std. error a:	0.00088796											Slope a:	-0.0045823	Std. error a:	0.00095864
		t:	3.719	p (slope):	0.00020279											t:	4.78	p (slope):	1.8493e-06
	Intercept b:	7.0694	Std. error b:	0.15317											Intercept b:	9.3787	Std. error b:	0.16641
	95% bootstrapped confidence intervals (N=1999):														95% bootstrapped confidence intervals (N=1999):
	Slope a:	(0,0016551, 0,0048948)													Slope a:	(-0,0066106, -0,0026747)
	Intercept b:	(6,7812, 7,3528)													Intercept b:	(9,0346, 9,7454)
	Correlation:														Correlation:
	r:	0.059175													r:	-0.09277
	r2:	0.0035017													r2:	0.0086063
	t:	3.719													t:	-4.78
	p (uncorr.):	0.00020279													p (uncorr.):	1.8493e-06
	Permutation p:	0.0002													Permutation p:	0.0001
Table 6SM. Relationship between DO and tide cycle.
