# Supplementary figures and images for: The SHAPE Project: An Innovative Approach to Understanding Seasonal and Diel Dissolved Oxygen Dynamics in the Marano and Grado Lagoon (Adriatic Sea) under the WFD/2000/60/CE
Source: MDPI journal article supplement (doi:10.3390/jmse10020208), 2022-02-04

Radiation and DO.

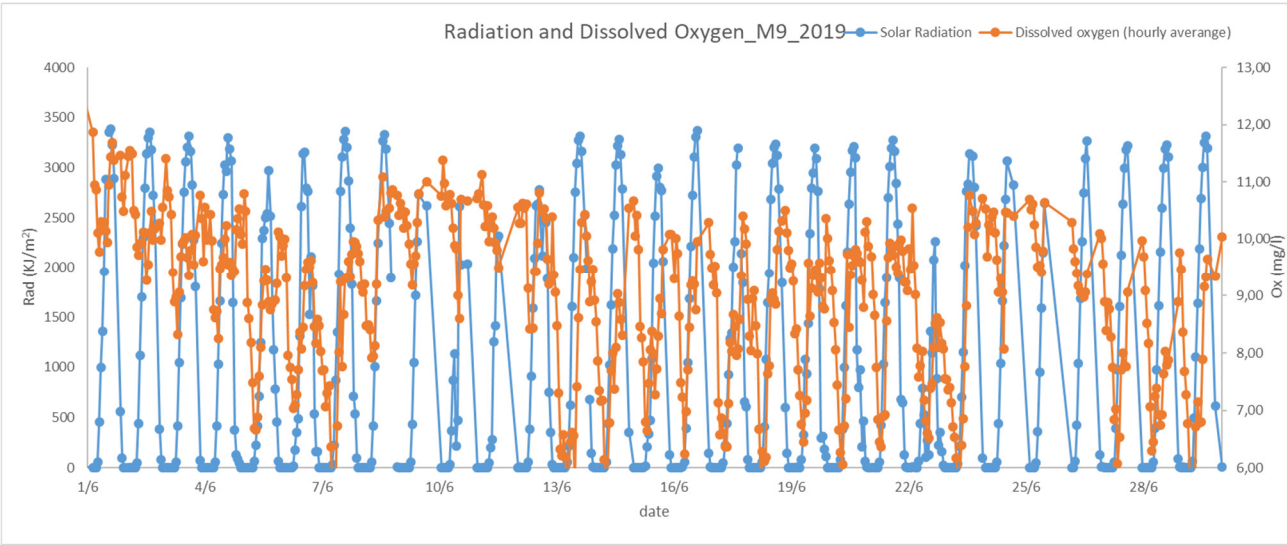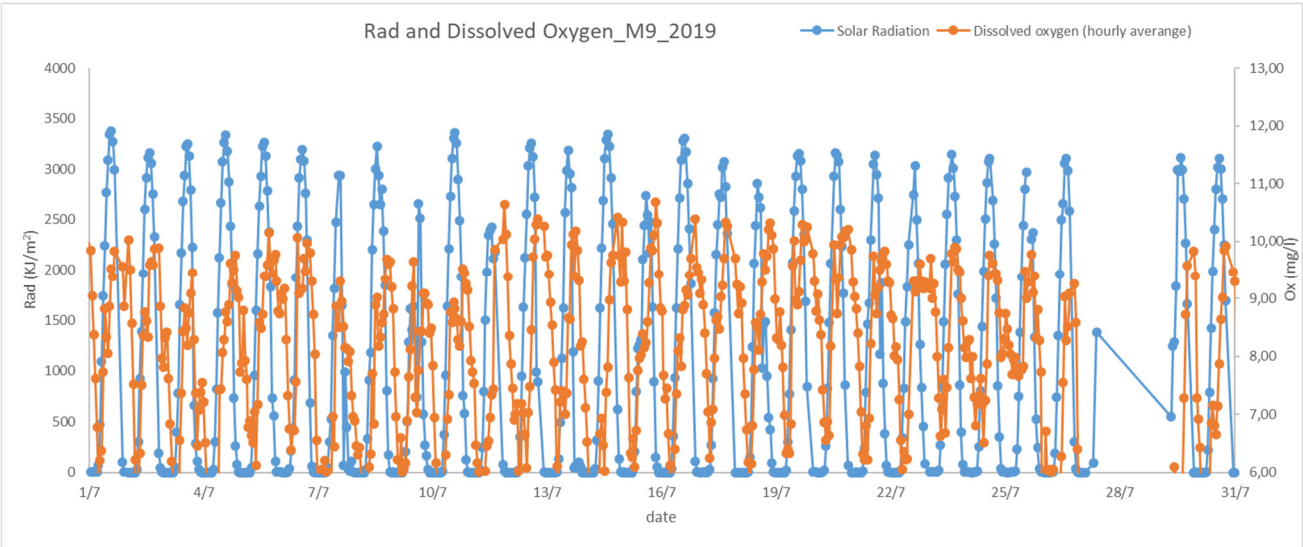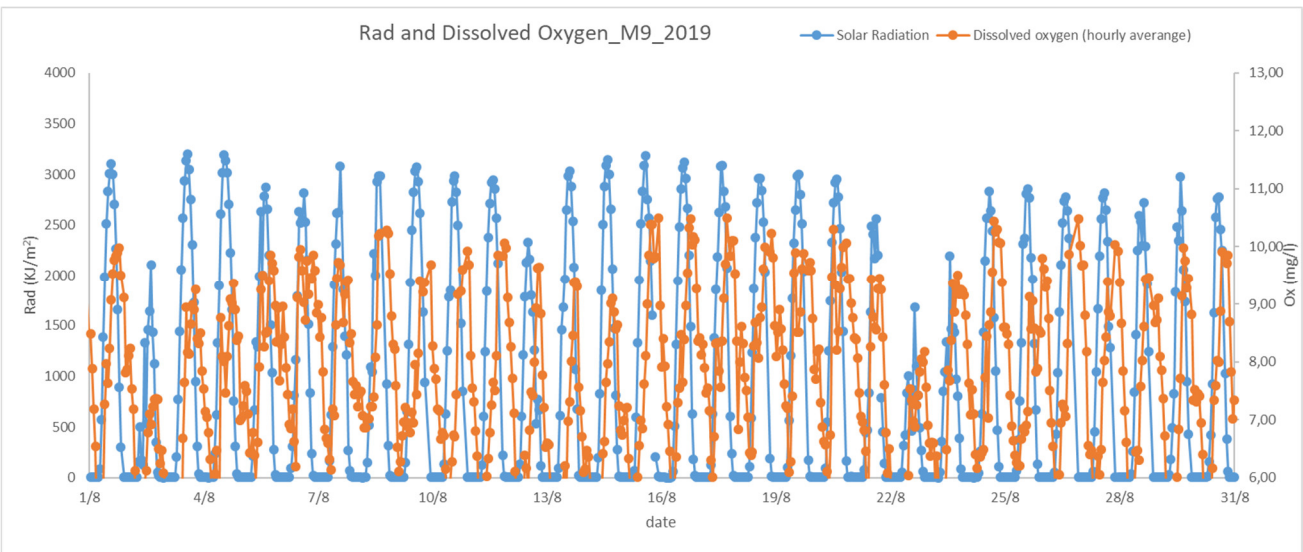

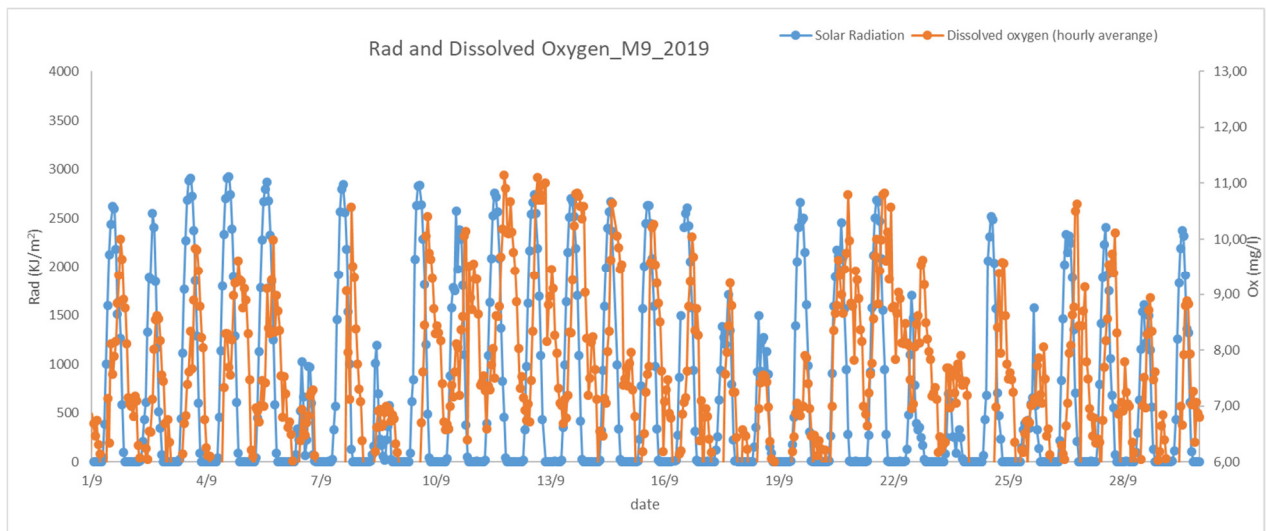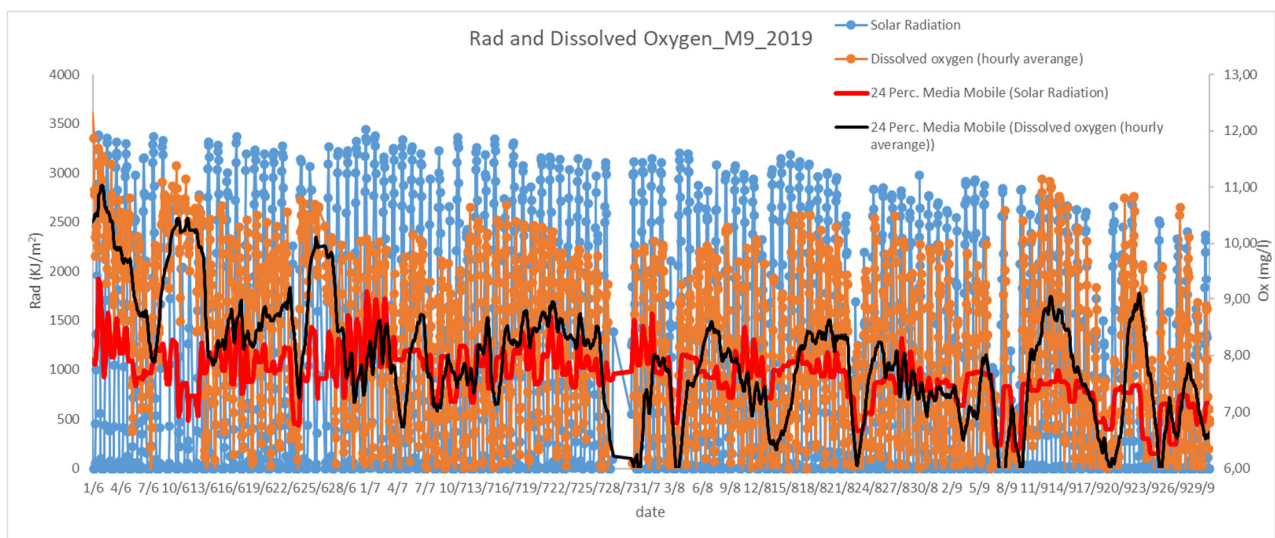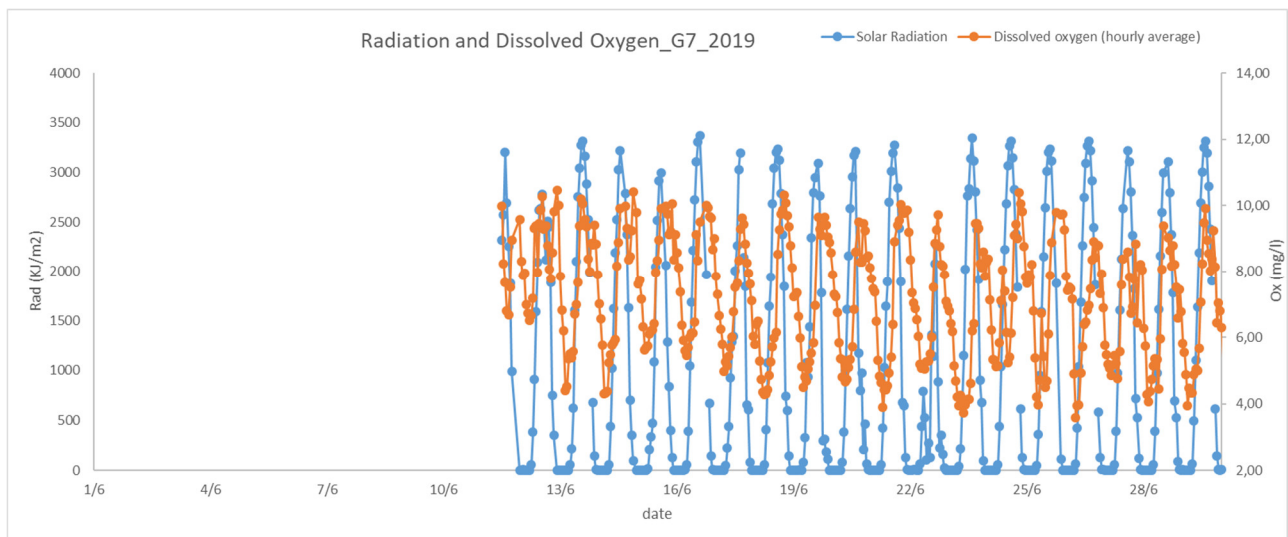



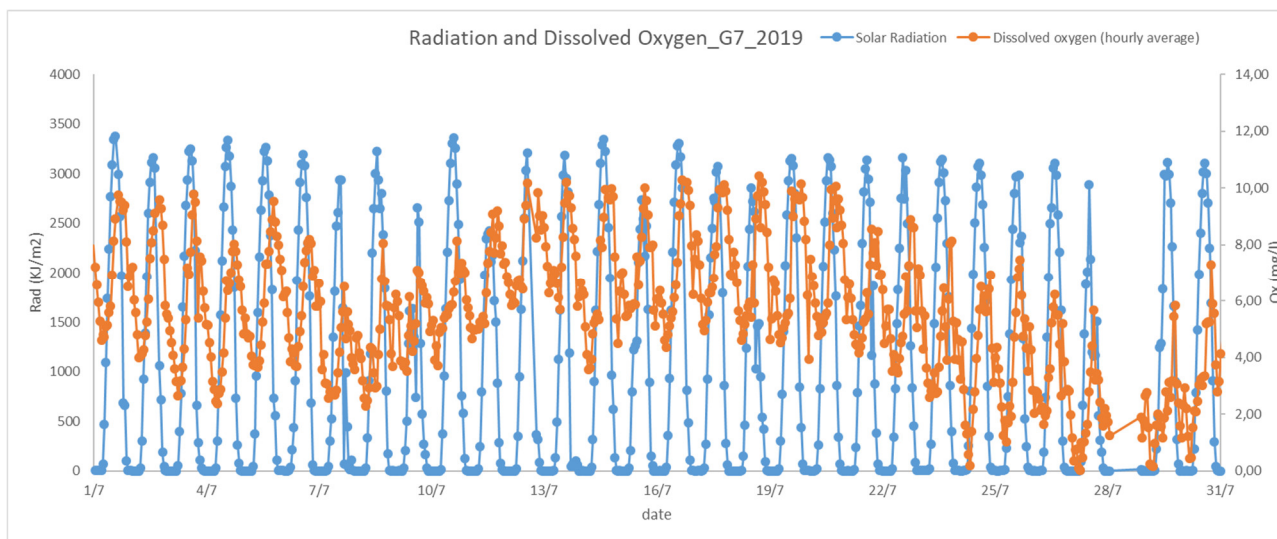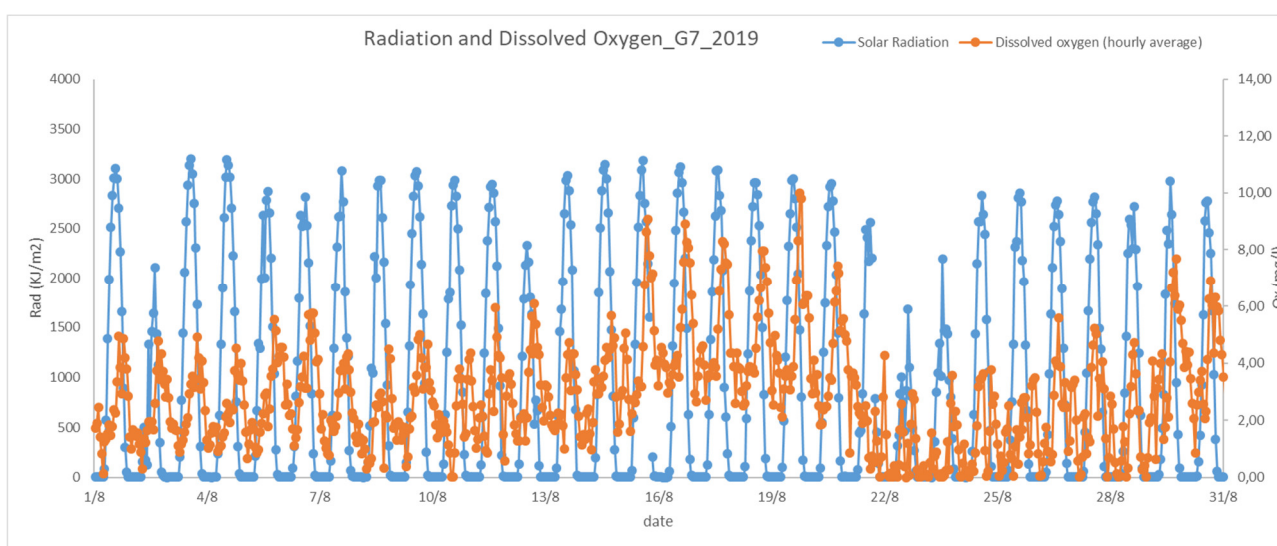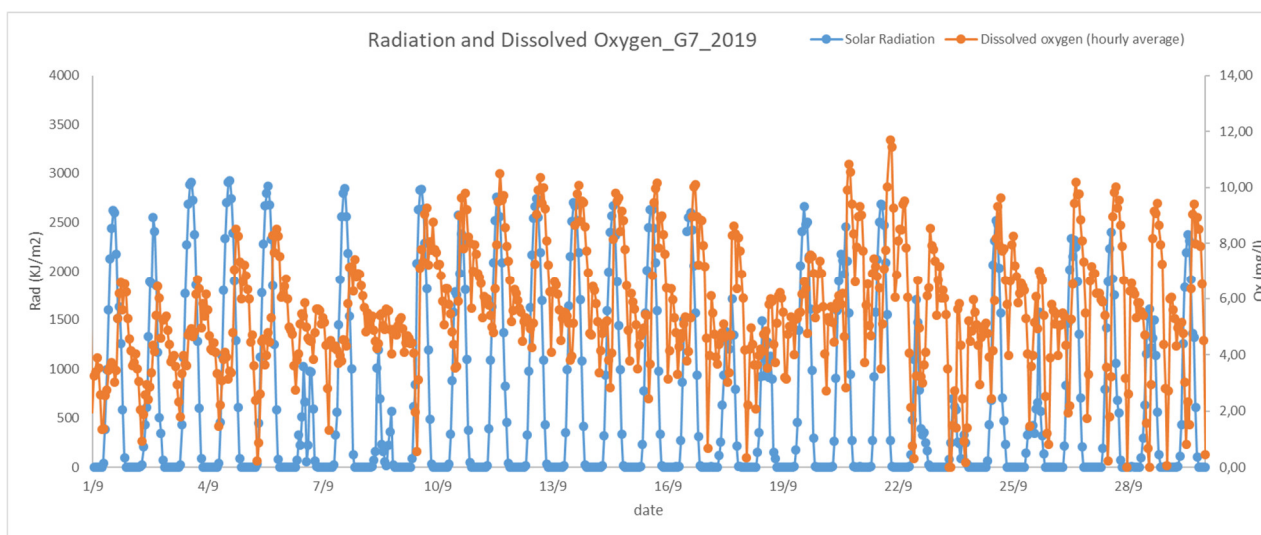

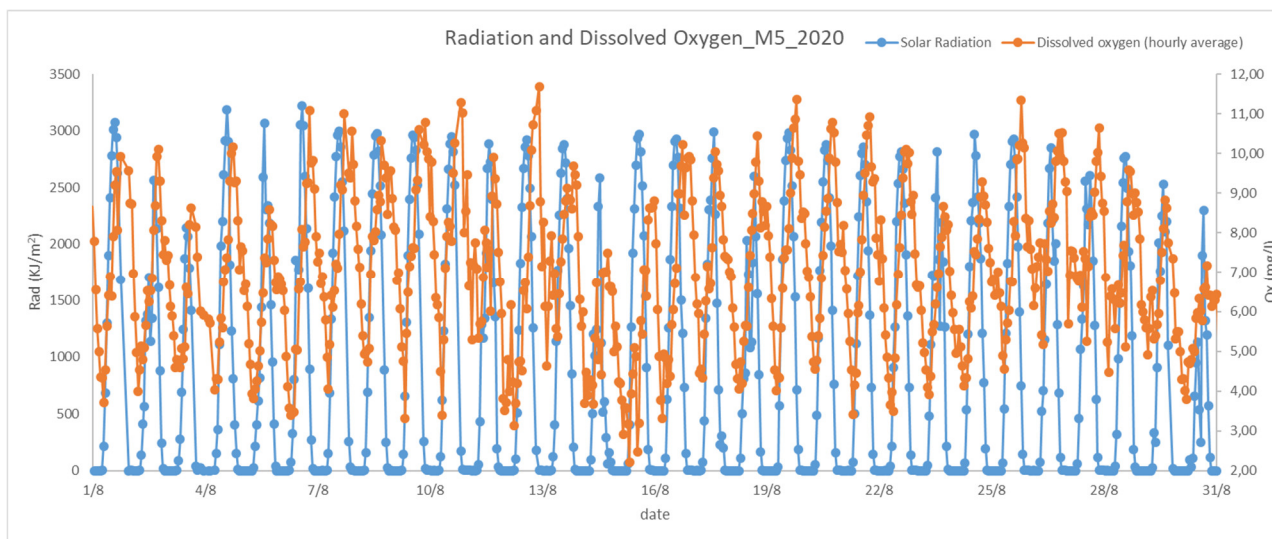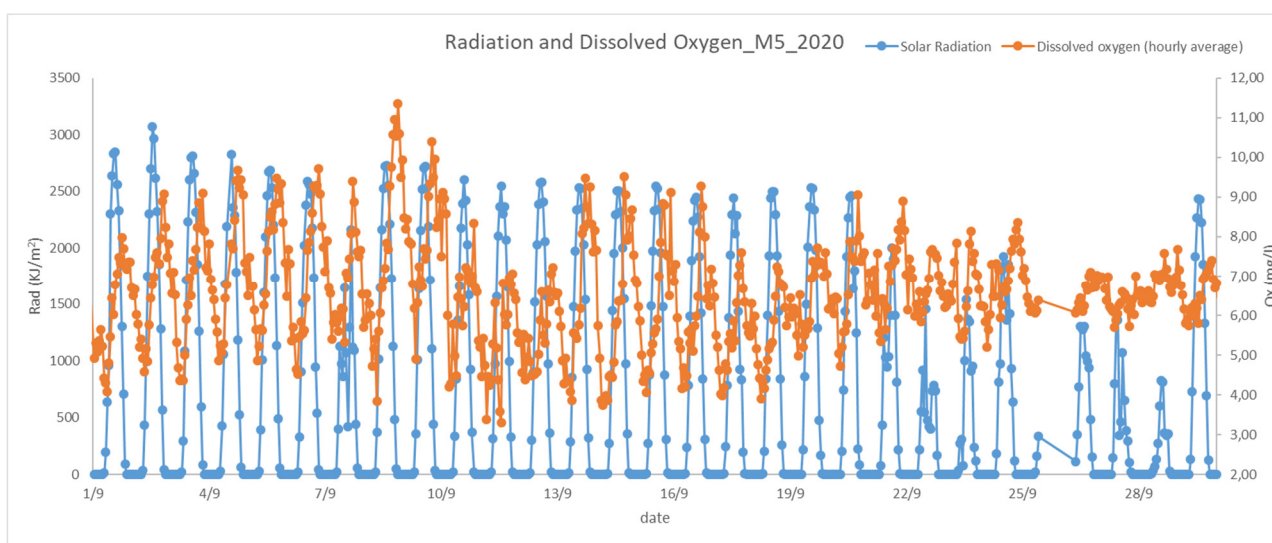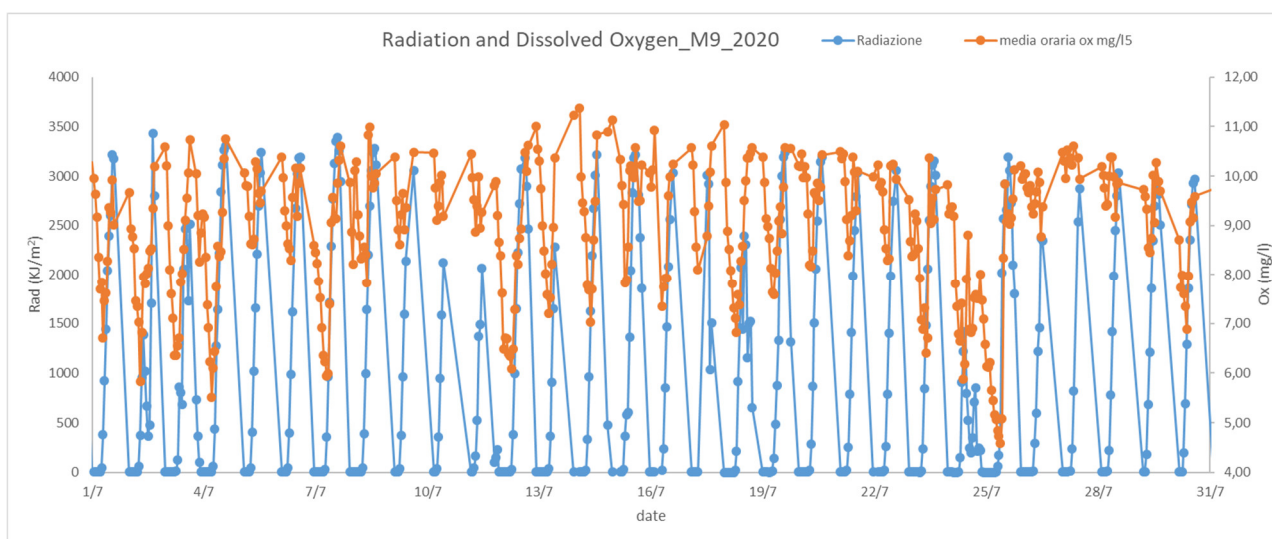

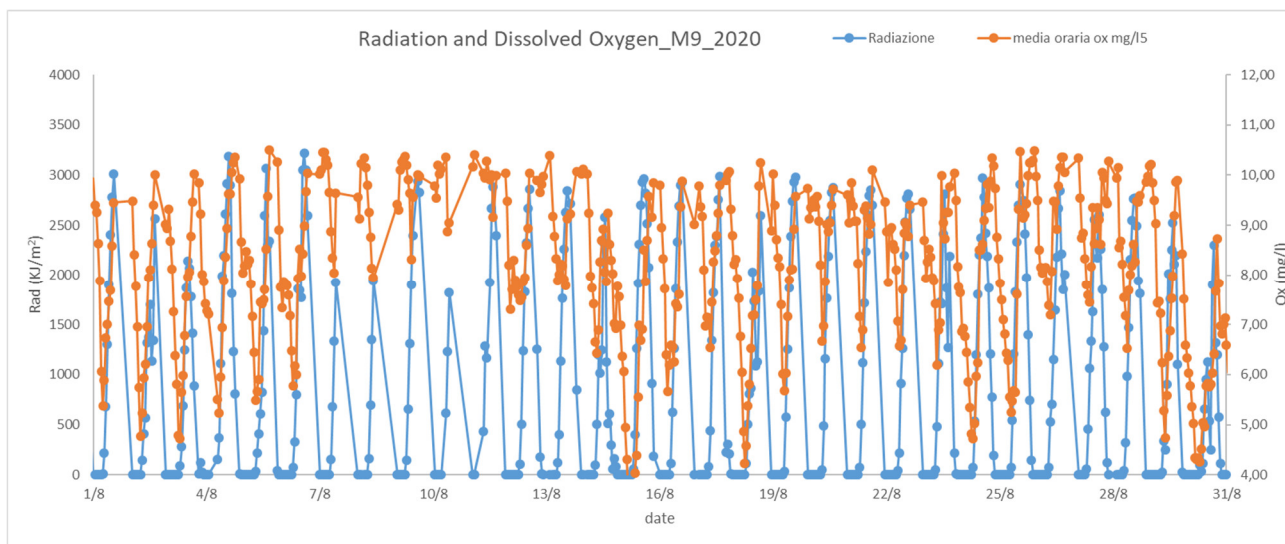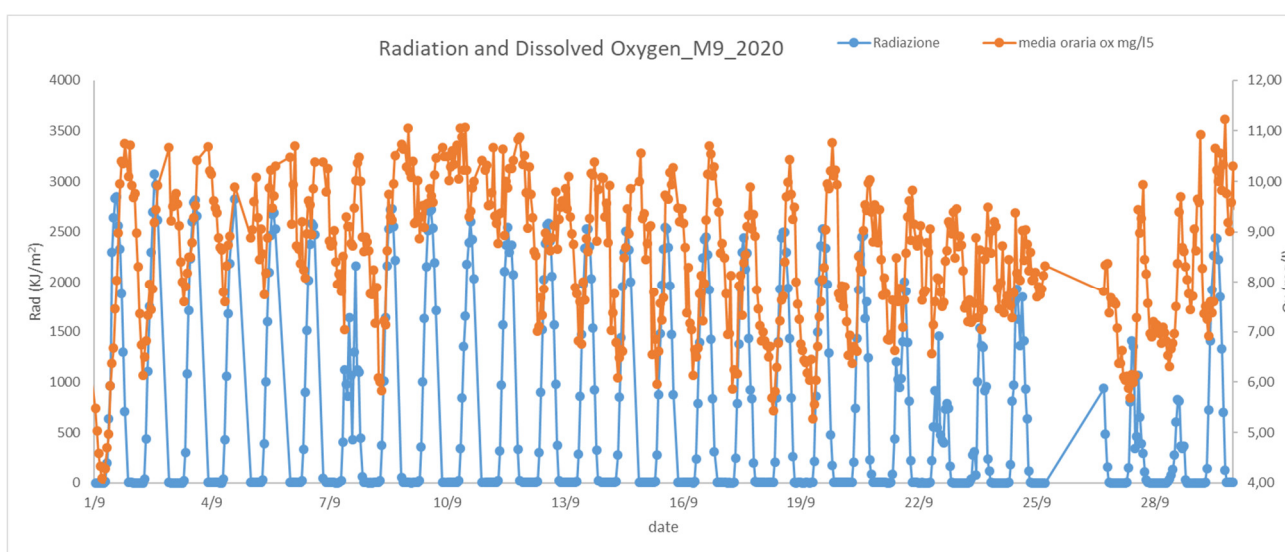

Supplement: s1 [file s1]

Dissolved oxygen and tides.

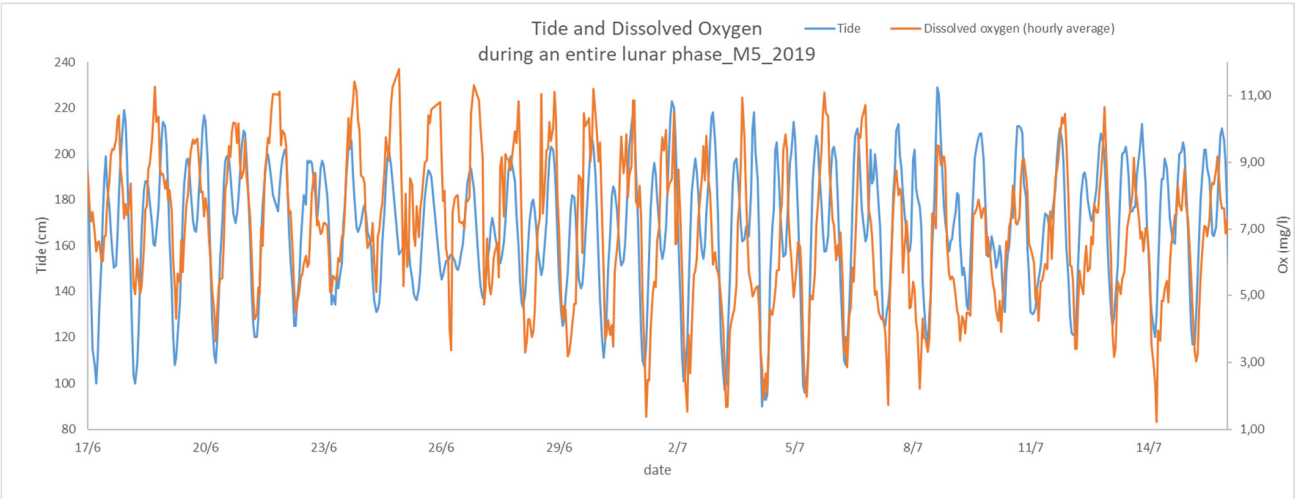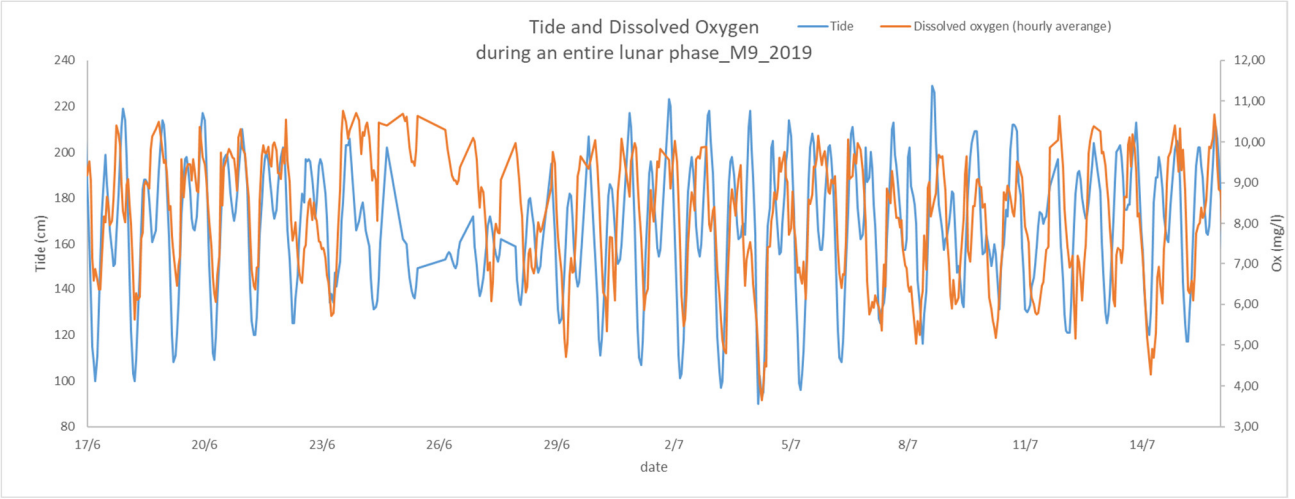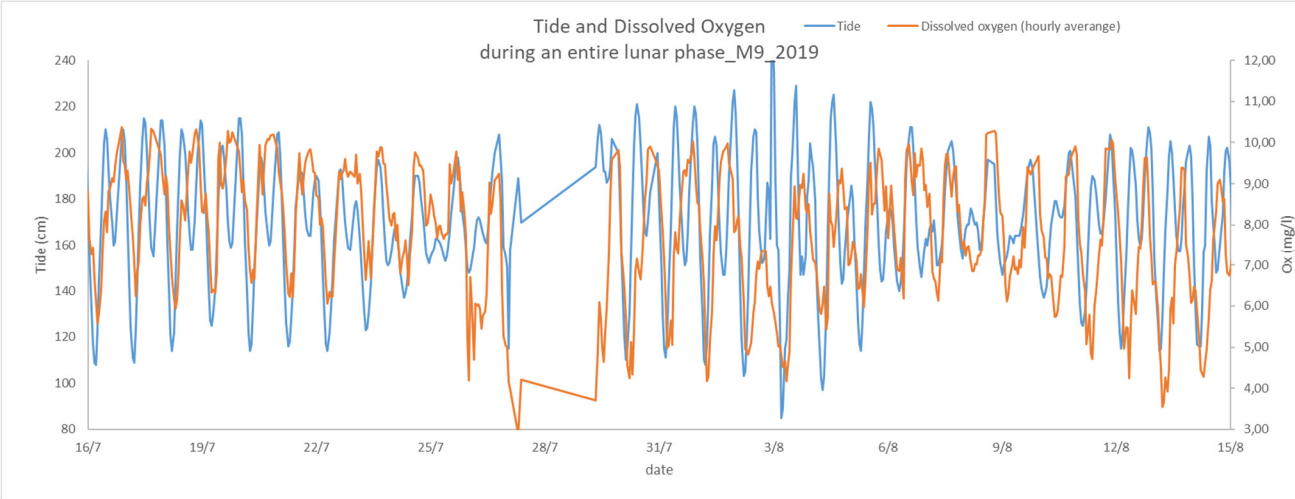

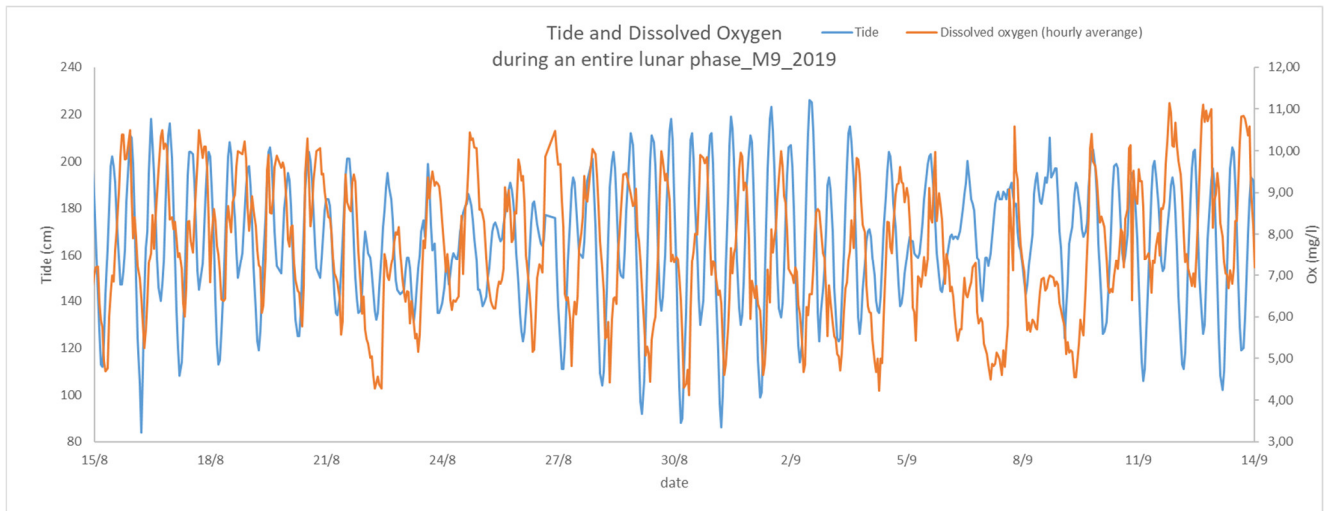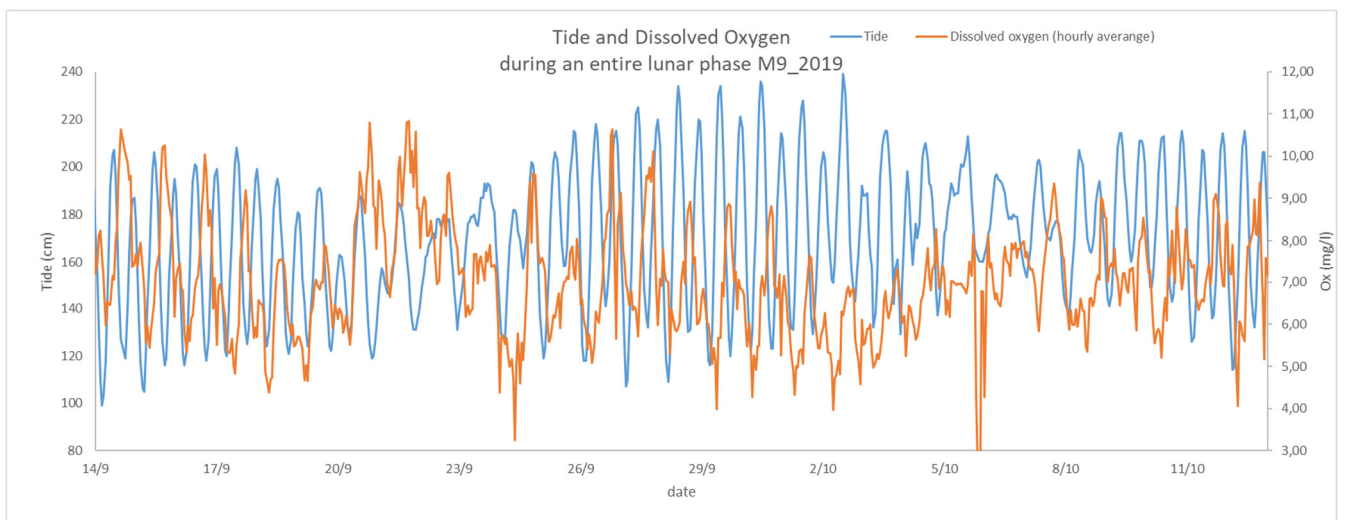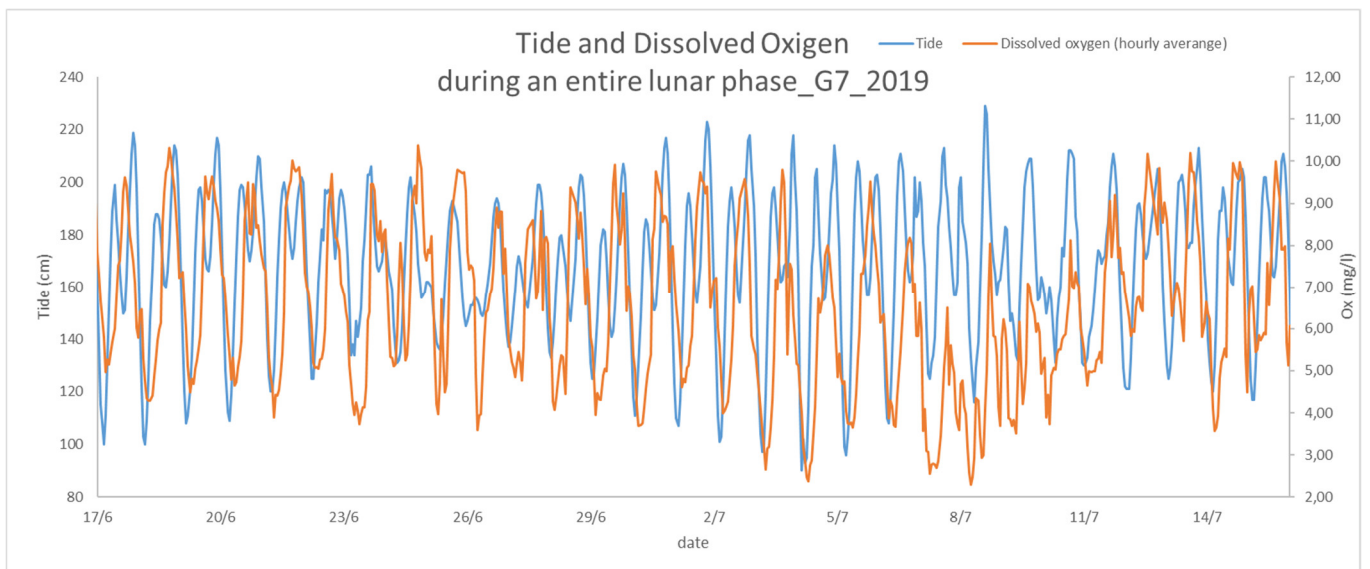

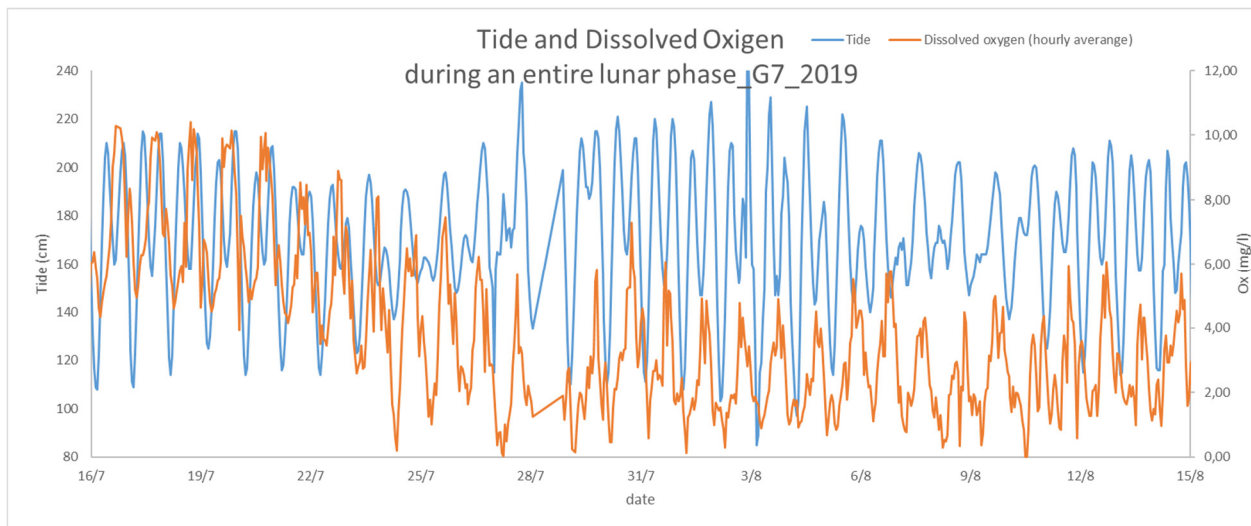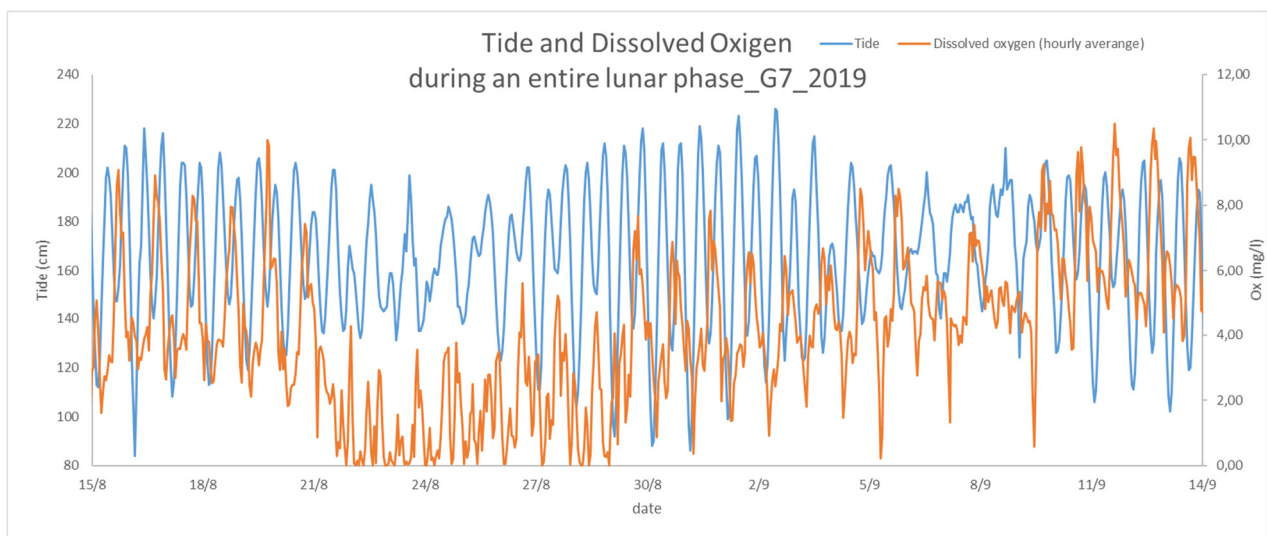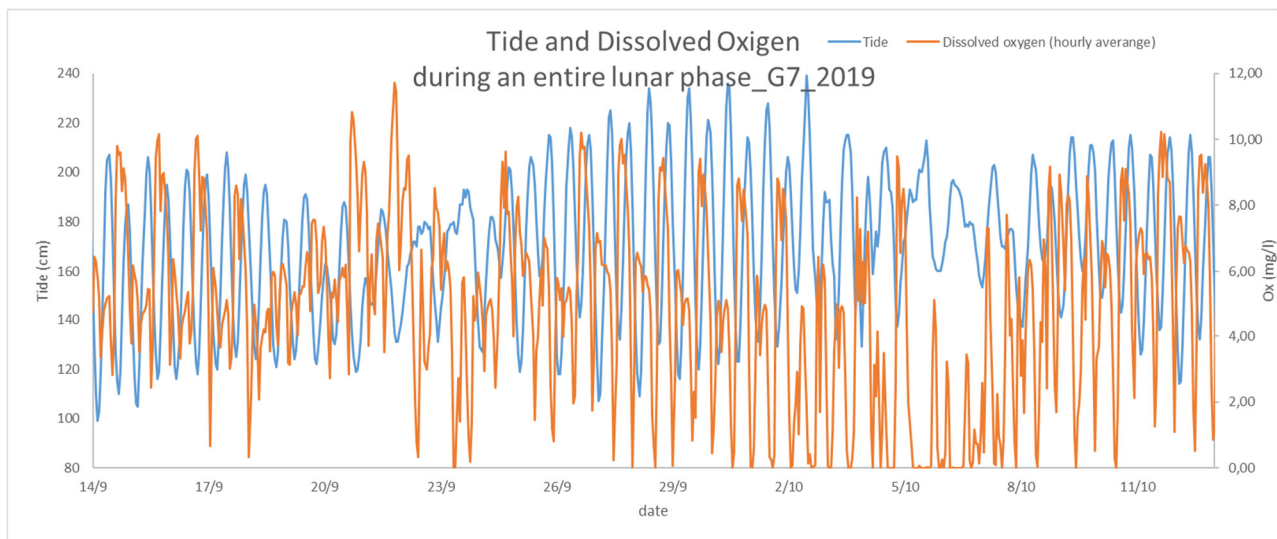



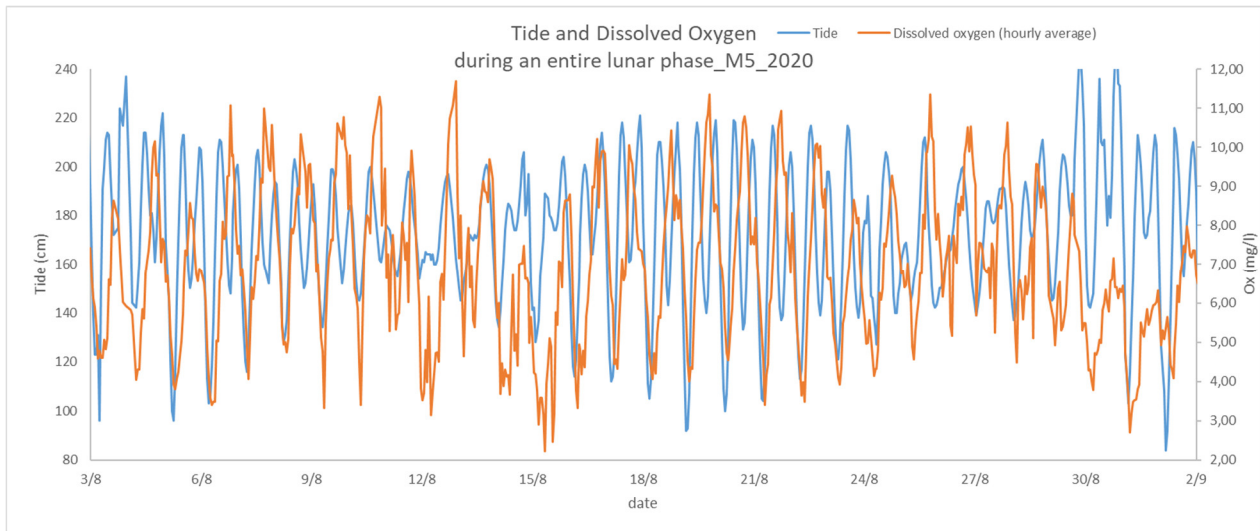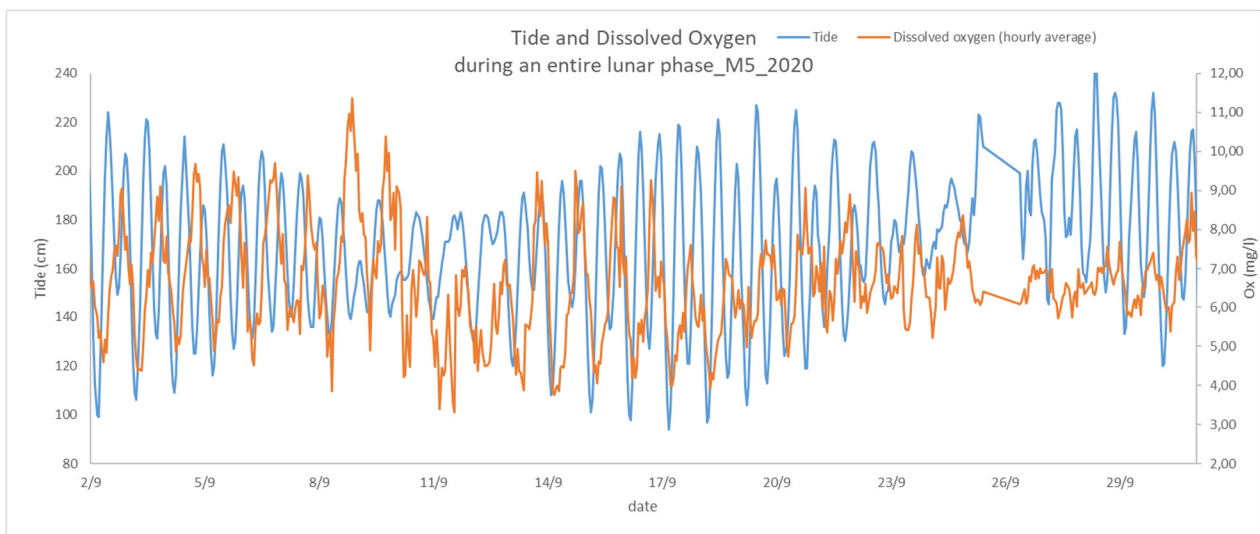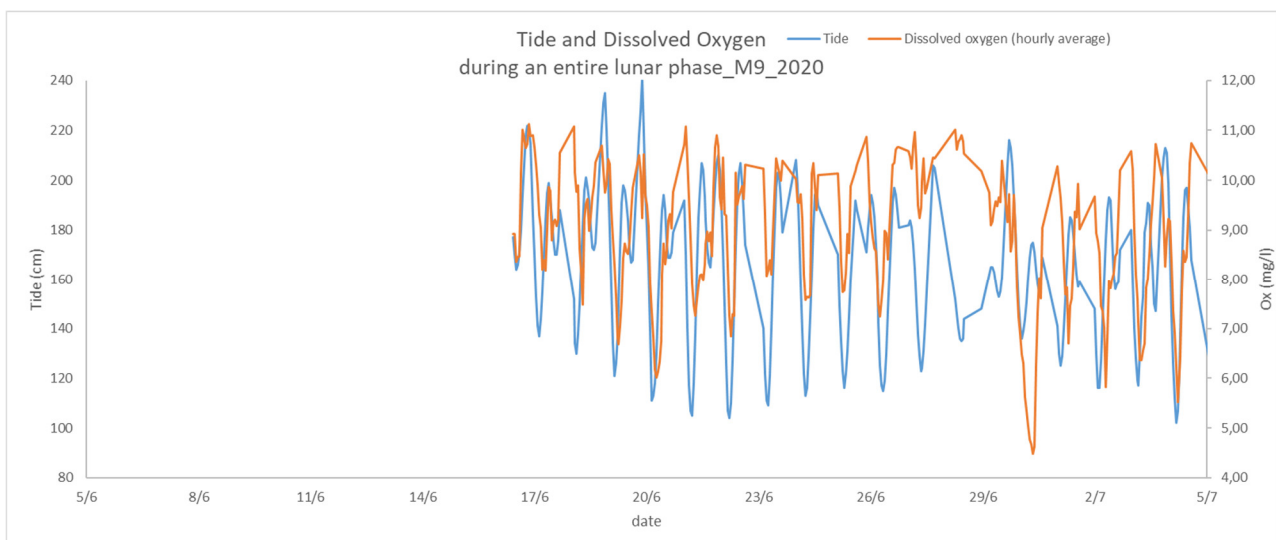

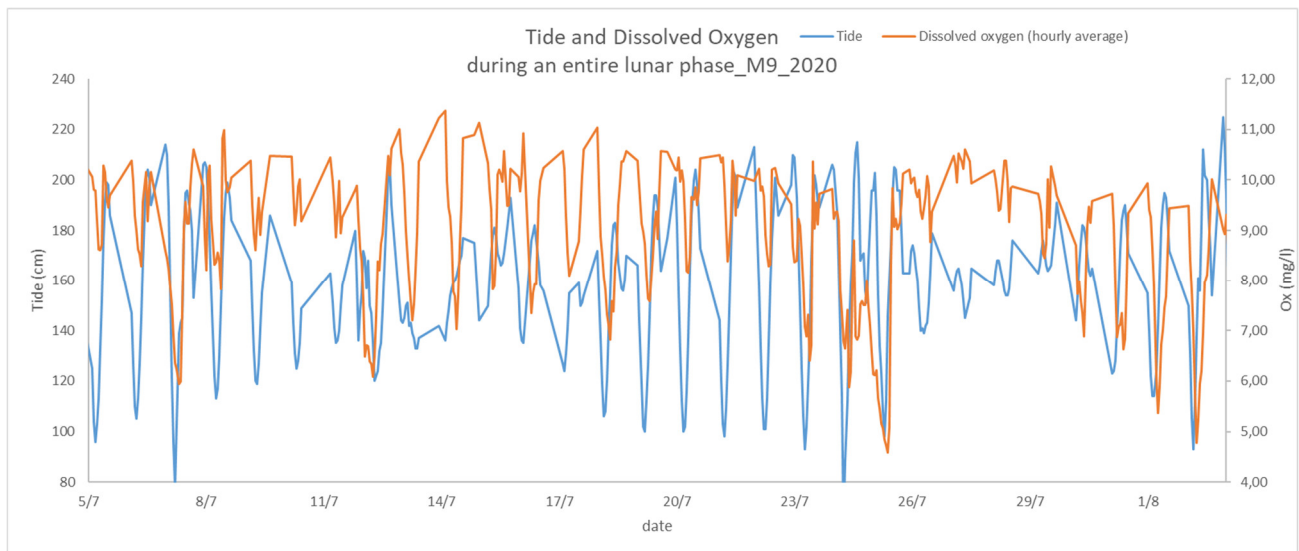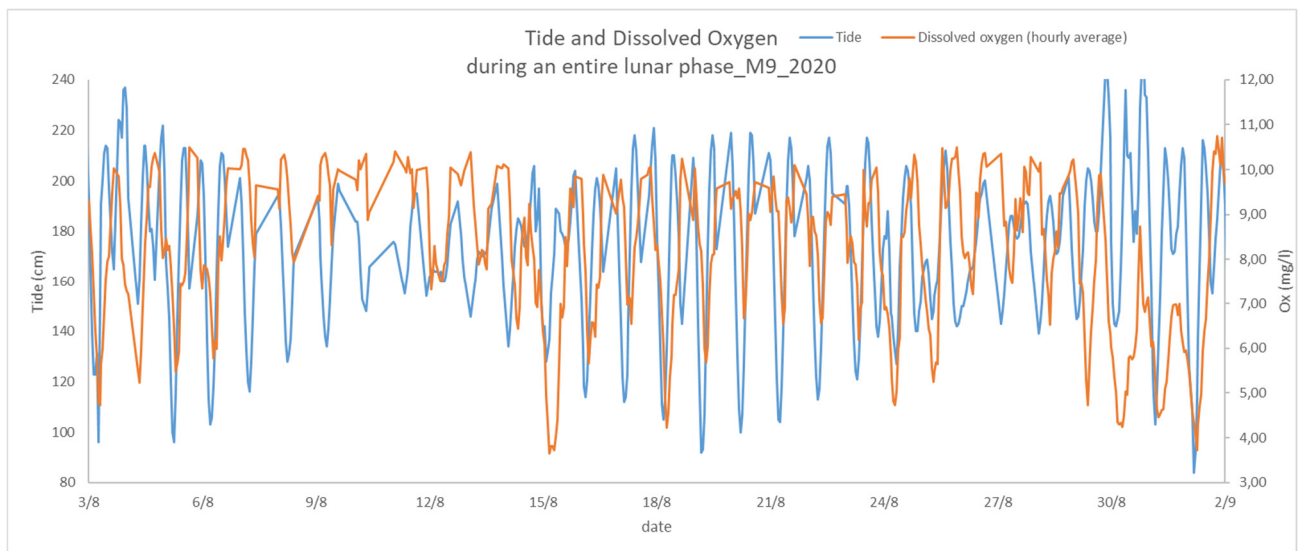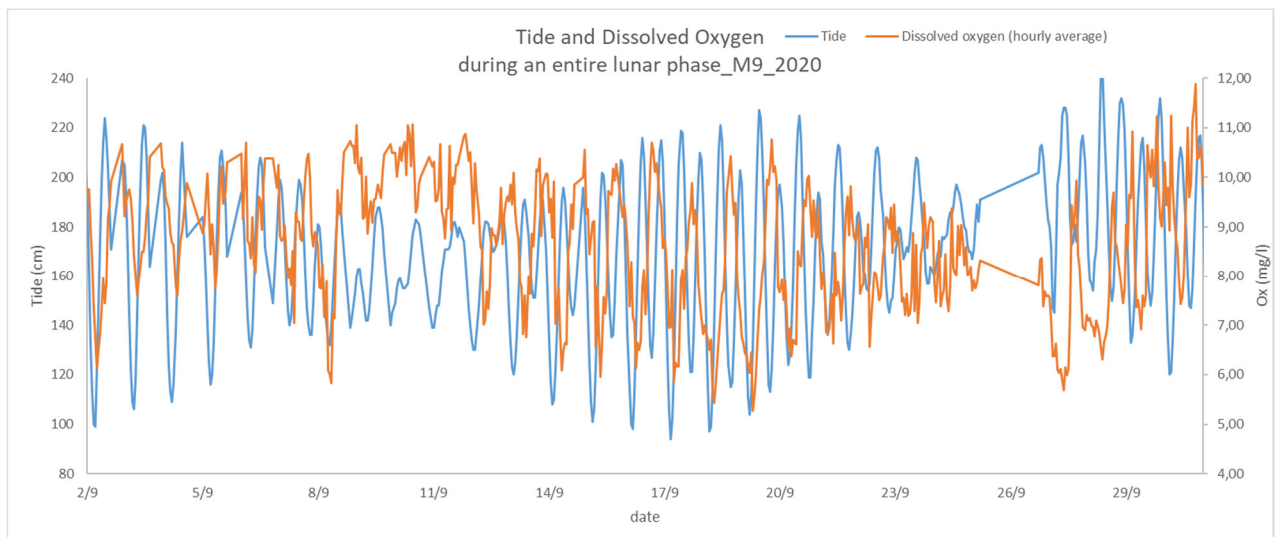

Supplement: s1 [file s1]
